# Supplementary material for: Energy efficient, one-step microwave-solvothermal synthesis of a highly electro-catalytic thiospinel NiCo2S4/graphene nanohybrid as a novel sustainable counter electrode material for Pt-free dye-sensitized solar cells
Source: Royal Society of Chemistry journal article supplement (doi:10.1039/c6tc04619c), 2017-01-01
Supplement: c6tc04619c1.pdf [file c6tc04619c1.pdf]

## Supporting Information

# Energy efficient, one-step microwave-solvothermal synthesis of highly electro-catalytic thiospinel $\text{NiCo}_2\text{S}_4$ /graphene nanohybrid as a novel sustainable counter electrode material for Pt-free dye-sensitized solar cells

R. Krishnapriya<sup>a</sup>, S. Praneetha<sup>a</sup>, Arul Maximus Rabel<sup>b</sup> and A. Vadivel Murugan<sup>a\*</sup>

<sup>a</sup>Advanced Functional Nanostructured Materials Laboratory, Centre for Nanoscience and Technology, Madanjeet School of Green Energy Technologies, Pondicherry University (A Central University), Pondicherry-605014, India. Tel. +91-413-2654 975, \*E-mail: [avmrakeshwar@gmail.com](mailto:avmrakeshwar@gmail.com); [avmurugan.nst@pondiuni.edu.in](mailto:avmurugan.nst@pondiuni.edu.in).

<sup>b</sup>Centre for Nanoscience and NanoTechnology, International Research Centre, Satyabhama University, Chennai-600119, India.

---

**Note:** This supplementary information contains Synthesis procedure used for the preparation of GO, DSSC fabrication and characterization procedure with supplementary Figure S1

### Preparation of GO

The Graphene oxide (GO) used in this process was prepared from graphite natural flake using ‘modified Hummers’ method as reported in earlier work.<sup>1,2</sup> In brief, 1.25 g each of graphite powder and  $\text{KNO}_3$  were added gradually into 58 mL of concentrated  $\text{H}_2\text{SO}_4$  (98% Fisher Scientific) at room temperature. The mixture was stirred for 10 min towards the addition of 7.5 g of  $\text{KMnO}_4$ , then heated to 35°C and constantly stirred for 6 h. Subsequently, 20 mL of  $\text{H}_2\text{O}$  was added drop wise under constant stirring, bringing about a quick temperature rise to 90-95 °C for 30 min. Later, 50 mL of  $\text{H}_2\text{O}$  and 1.5 mL of  $\text{H}_2\text{O}_2$  (30 wt %) (Fischer Scientific) was added drop by drop to dissolve insoluble manganese species. A yellow colored GO suspension was obtained which was washed until pH reached nearly 5. The resulting suspension was sonicated for 30 min using Ti-Horn probe Vibra Cell (VCX 750), Sonics and Materials, Inc., USA. The obtained GO suspension was finally dried at 60 °C in vacuum oven.

## DSSC Device Fabrication.

The photoanodes for DSSCs were prepared using doctor-blade technique, referring to our earlier works.<sup>3,4</sup> 0.5 g of the TiO<sub>2</sub> sample prepared by MW-HT was dispersed into 4 mL ethanol by ultrasonication for 10 min. Then 1.5 g terpineol and 0.1 g ethyl cellulose were added and the solution was again subjected to sonication to form a homogenous viscous paste. The obtained paste was spread over a well-cleaned fluorine-doped tin oxide (FTO) glass substrate (Sigma Aldrich) by doctor-blade method to obtain a thickness of ~17 – 22  $\mu\text{m}$  using 3M scotch adhesive tape into an area of 0.25 cm<sup>2</sup> (with suitable mask). After air-drying, sintering was done at 450 °C for 1 h with temperature ramping rate of 5°C min<sup>-1</sup>. When room temperature was attained, the coated substrates were sensitized by soaking into a 0.5 mM N719 dye solution (Sigma-Aldrich) for 12 h. Later the sensitized photoanodes were rinsed with ethanol to remove the excess dye molecules on the photoanode surface.

The NiCo<sub>2</sub>S<sub>4</sub> and NiCo<sub>2</sub>S<sub>4</sub>/GNS-hybrid CEs were prepared on FTO by a facile drop-casting technique. In detail, 1 mg of the synthesized NiCo<sub>2</sub>S<sub>4</sub> or NiCo<sub>2</sub>S<sub>4</sub>/GNS hybrid was dispersed in 4 mL of ethanol by ultrasonication for few minutes to form a homogenous CE ink solution. 1 or 2 drops of this ink solution was spread over cleaned FTO by drop-casting method. The resultant CE film was dried in vacuum oven at 80°C for 6 h. As a reference for comparison studies, Pt CE was fabricated by drop-casting 5 mM H<sub>2</sub>PtCl<sub>6</sub> (in isopropanol) upon a pre-cleaned FTO and successively annealed at 400°C for 20 min. While assembling the DSSCs, two electrodes were sandwiched together with Surlyn film (30 $\mu\text{m}$ ) as spacer by two binder clips. The redox electrolyte containing 0.06 M 1-butyl-3-methyl imidazolium iodide, 0.03 M of iodine solution (I<sub>2</sub>), 0.10 M guanidiniumthiocyanate, 0.5 M 4-tert-butylpyridine in a solvent mixture of acetonitrile and valeronitrile (v/v, 85:15) was introduced between the two electrodes.

## 2.5 DSSC Device Characterization

Photovoltaic (PV) measurements were implemented by a Newport® 150W 96000 solar simulator set at 100 mWcm<sup>-2</sup> full spectrum power using AM1.5G filter. Current density-voltage (*J-V*) curves were generated using a Keithley 2400 source meter. The light intensity of the xenon light source was calibrated using a standard silicon photodiode (New Port, USA). The spectral response of the fabricated DSSCs were characterized by determining the wavelength dependence of the incident photon-to-current efficiency (IPCE) *via* focusing light using a xenon lamp with a monochromator on to the cell using Bentham PVE300 system. Electrochemical Impedance spectroscopy (EIS) and Cyclic Voltammetry (CV) measurements were executed on Biologic potentiostat-galvanostat (SP-150). CV measurements were done in a three-electrode system with different NiCo<sub>2</sub>S<sub>4</sub> CEs as working electrode, Ag/Ag<sup>+</sup> as reference electrode and a Pt wire as the counter electrode at a scan rate of 50 mVs<sup>-1</sup>. The electrolyte solution containing 0.1 M LiClO<sub>4</sub>, 1mM I<sub>2</sub> and 10 mM LiI in an anhydrous acetonitrile was used.

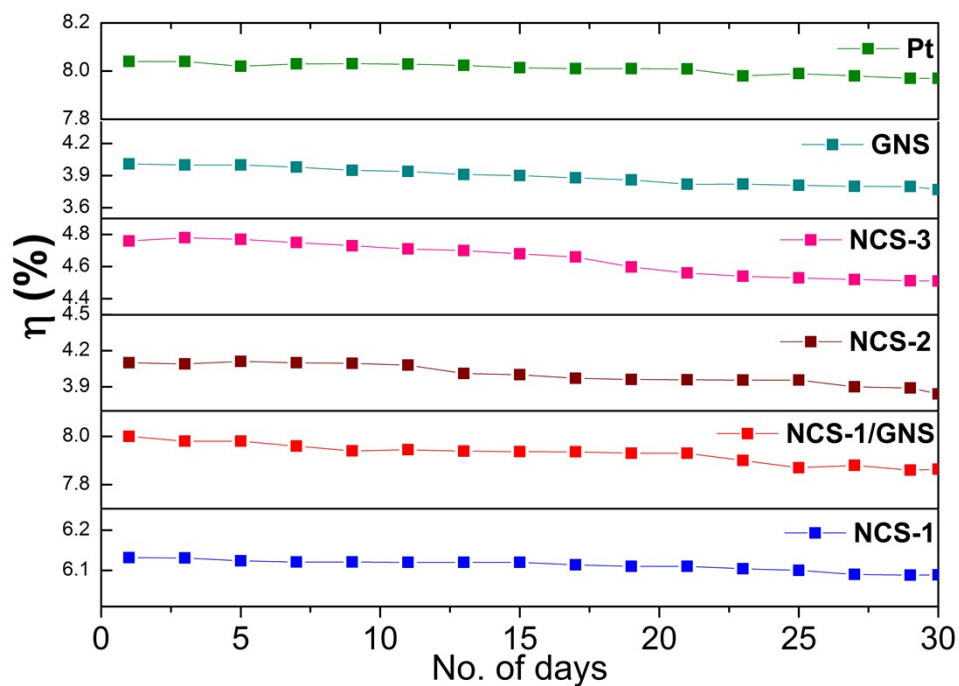

**Figure S1** The stability of PCE DSSCs assembled with different CEs studied over a period of 30 days under ambient conditions.

## REFERENCES

1. A. VadivelMurugan, T. Muraliganth, A. Manthiram, *Chem. Mater.* 2009, **21**, 5004-5006.
2. S. Praneetha, A. VadivelMurugan, *RSC Adv.*, 2013, **3**, 25403-25409.
3. R. Krishnapriya, S. Praneetha, A. VadivelMurugan, *CrystEngComm.* 2015, **17**, 8353-8367.
4. R. Krishnapriya, S. Praneetha, A. VadivelMurugan, *New. J. Chem.*, 2016, **40**, 5080-5089

\*\*\*\*\*
